# Supplementary material
Source: PubMed Central journal article supplement (PMC2148329)

**A**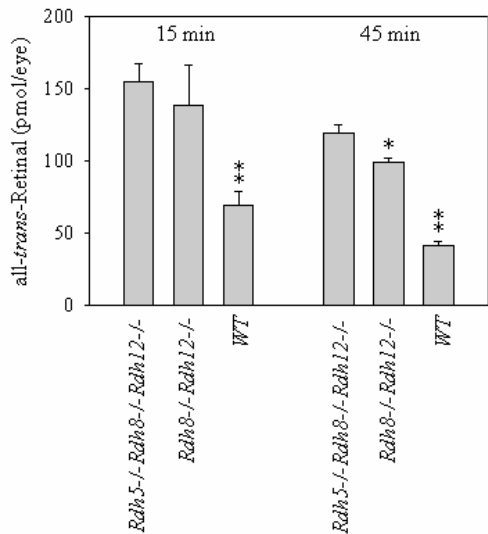**B**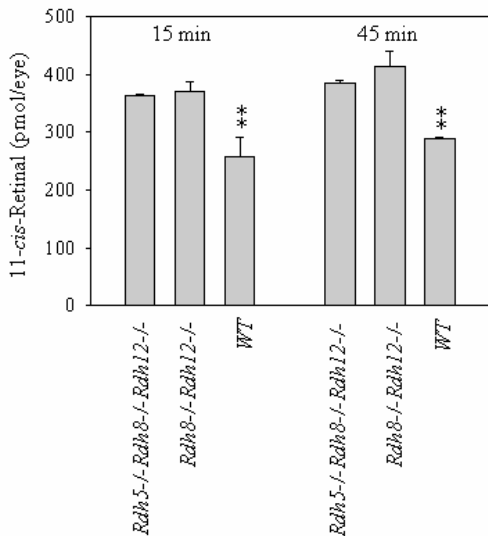

Supplement: pnas_0707477104_1.pdf [file pnas_0707477104_1.pdf]

A

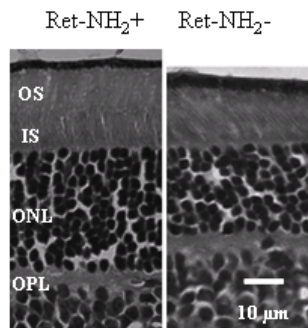

B

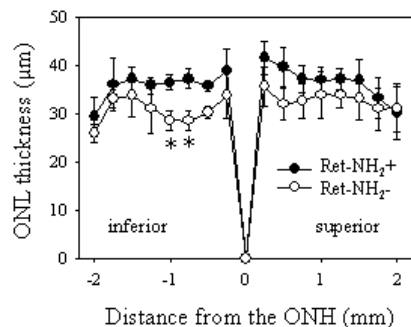

C

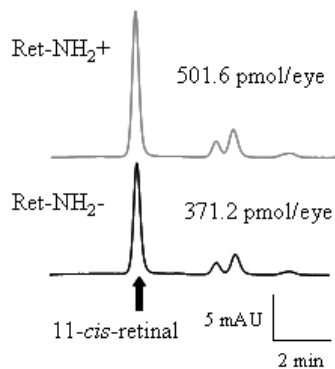

D

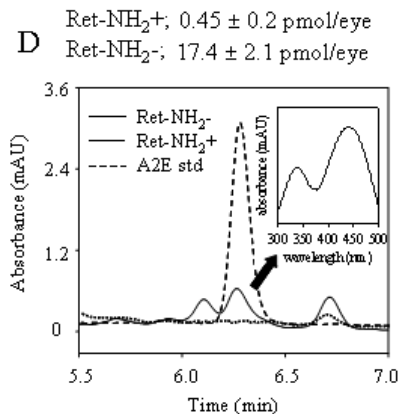

Supplement: pnas_0707477104_2.pdf [file pnas_0707477104_2.pdf]
